# Supplementary material
Source: publisher site journal article supplement (https://www.jstage.jst.go.jp/article/jsre/28/2/28_20-002/_supplement/_download/28_20-002_1.pdf)
Supplement: Supplementary file 1 [file 28_20-002_1.pdf]

Table S1

## BPQ-BA超短縮版, および短縮版項目の分類

| カテゴリー        | BPQ-BA項目                      |
|--------------|-------------------------------|
| 1 消化器系       | No. 13 胃や腸の痛み *               |
|              | No. 14 胃の膨満感や満腹感 *            |
|              | No. 6 消化に関する音                 |
|              | No. 8 便意                      |
|              | No. 26 便秘をしている感覚              |
| 2 発汗・体温調節系   | No. 15 手のひらに汗をかいていること         |
|              | No. 16 額に汗をかいていること            |
|              | No. 18 脇の下に汗をかくこと             |
|              | No. 19 顔や耳が熱くなっていること          |
| 3 筋緊張系       | No. 9 腕や足の筋肉の緊張 *             |
|              | No. 12 鳥肌 *                   |
|              | No. 17 くちびるの震え *              |
|              | No. 22 “背筋がぞっとして” 髪の毛が逆立つ感覚 * |
|              | No. 11 顔の筋肉の緊張                |
| No. 21 全身の震え |                               |
| 4 呼吸器・循環器系   | No. 4 どれだけ早く呼吸をしているか *        |
|              | No. 7 体や身体の一部の腫れ *            |
|              | No. 10 水の摂取によるむくみ感 *          |
|              | No. 25 どれだけ強く心臓が鼓動しているか *     |
| 5 口腔・咽喉系     | No. 3 口のなかが乾いているか *           |
|              | No. 24 つばを飲み込む衝動 *            |
|              | No. 1 よく唾を飲んでいること             |
|              | No. 2 咳や咳払いをしようとする衝動          |
|              | No. 20 歯ぎしり                   |
| 6 眼・涙腺系      | No. 5 目の潤みや涙が出ていること           |
|              | No. 23 焦点を合わせるのが難しいこと         |

BPQ-BA: Body Perception Questionnaire-Body Awareness. \*はBPQ-BA超短縮版に含まれる12項目を意味する。

Table S2

日本語版BPQ-BA短縮版の因子分析の結果(研究2)

|       |                      | サンプル3 (EFA, N = 305) |     |      |      | サンプル4 (CFA, N = 295) |     |      |      |
|-------|----------------------|----------------------|-----|------|------|----------------------|-----|------|------|
|       |                      | 負荷量                  | 共通性 | Mean | SD   | 負荷量                  | 共通性 | Mean | SD   |
| No.1  | よく唾を飲んでいること          | <b>.54</b>           | .29 | 2.02 | 0.97 | <b>.54</b>           | .29 | 2.06 | 1.03 |
| No.2  | 咳や咳払いをしようとする衝動       | <b>.69</b>           | .47 | 2.82 | 1.20 | <b>.62</b>           | .39 | 2.77 | 1.23 |
| No.3  | 口のなかが乾いているか*         | <b>.53</b>           | .28 | 2.79 | 1.07 | <b>.54</b>           | .29 | 2.82 | 1.16 |
| No.4  | どれだけ早く呼吸をしているか*      | <b>.63</b>           | .40 | 2.05 | 1.04 | <b>.62</b>           | .39 | 2.10 | 1.07 |
| No.5  | 目の潤みや涙が出ていること        | <b>.76</b>           | .58 | 2.73 | 1.31 | <b>.64</b>           | .41 | 2.68 | 1.24 |
| No.6  | 消化に関係する音             | <b>.45</b>           | .20 | 2.50 | 1.06 | <b>.55</b>           | .31 | 2.58 | 1.24 |
| No.7  | 体や身体の一部の腫れ*          | <b>.61</b>           | .37 | 2.08 | 1.04 | <b>.64</b>           | .41 | 2.18 | 1.15 |
| No.8  | 便意                   | <b>.49</b>           | .24 | 3.66 | 1.19 | <b>.52</b>           | .27 | 3.63 | 1.20 |
| No.9  | 腕や足の筋肉の緊張*           | <b>.64</b>           | .41 | 2.18 | 1.02 | <b>.58</b>           | .33 | 2.22 | 1.11 |
| No.10 | 水の摂取によるむくみ感*         | <b>.26</b>           | .07 | 1.88 | 1.04 | <b>.37</b>           | .13 | 1.94 | 1.06 |
| No.11 | 顔の筋肉の緊張              | <b>.62</b>           | .39 | 2.06 | 1.01 | <b>.59</b>           | .35 | 2.07 | 1.09 |
| No.12 | 鳥肌*                  | <b>.74</b>           | .55 | 2.57 | 1.16 | <b>.69</b>           | .48 | 2.60 | 1.23 |
| No.13 | 胃や腸の痛み*              | <b>.68</b>           | .47 | 2.66 | 1.21 | <b>.70</b>           | .49 | 2.57 | 1.26 |
| No.14 | 胃の膨満感や満腹感*           | <b>.59</b>           | .35 | 3.27 | 1.12 | <b>.69</b>           | .47 | 3.08 | 1.20 |
| No.15 | 手のひらに汗をかいていること       | <b>.60</b>           | .36 | 2.52 | 1.18 | <b>.59</b>           | .35 | 2.53 | 1.20 |
| No.16 | 額に汗をかいていること          | <b>.62</b>           | .38 | 2.67 | 1.14 | <b>.61</b>           | .37 | 2.81 | 1.23 |
| No.17 | くちびるの震え*             | <b>.62</b>           | .38 | 1.49 | 0.91 | <b>.66</b>           | .43 | 1.55 | 1.00 |
| No.18 | 脇の下に汗をかくこと           | <b>.48</b>           | .23 | 3.08 | 1.07 | <b>.53</b>           | .28 | 3.27 | 1.12 |
| No.19 | 顔や耳が熱くなっていること        | <b>.72</b>           | .52 | 2.54 | 1.14 | <b>.71</b>           | .51 | 2.59 | 1.15 |
| No.20 | 歯ぎしり                 | <b>.20</b>           | .04 | 1.46 | 0.81 | <b>.34</b>           | .11 | 1.63 | 0.97 |
| No.21 | 全身の震え                | <b>.72</b>           | .52 | 1.80 | 1.17 | <b>.77</b>           | .59 | 1.78 | 1.16 |
| No.22 | “背筋がぞっとして”髪の毛が逆立つ感覚* | <b>.64</b>           | .41 | 1.89 | 1.05 | <b>.71</b>           | .50 | 1.87 | 1.05 |
| No.23 | 焦点を合わせるのが難しいこと       | <b>.44</b>           | .19 | 2.00 | 1.12 | <b>.49</b>           | .24 | 2.17 | 1.24 |
| No.24 | つばを飲み込む衝動*           | <b>.57</b>           | .33 | 2.16 | 1.05 | <b>.58</b>           | .33 | 2.26 | 1.17 |
| No.25 | どれだけ強く心臓が鼓動しているか*    | <b>.63</b>           | .40 | 2.32 | 1.04 | <b>.67</b>           | .45 | 2.32 | 1.12 |
| No.26 | 便秘をしている感覚            | <b>.39</b>           | .15 | 2.64 | 1.30 | <b>.47</b>           | .22 | 2.62 | 1.35 |
|       |                      | 累積寄与率 (%) 37.45      |     |      |      | 39.15                |     |      |      |

BPQ-BA: Body Perception Questionnaire-Body Awareness, EFA: Exploratory Factor Analysis, CFA: Confirmatory Factor Analysis. \*はBPQ-BA日本語超短縮版に含まれる12項目を意味する。

(研究1:日本語版BPQ-BA超短縮版)

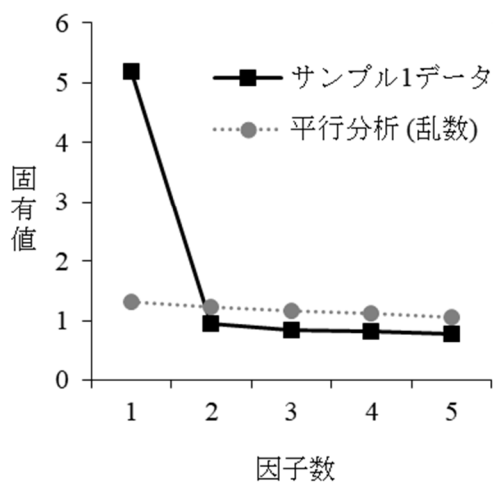

(研究2:日本語版BPQ-BA短縮版)

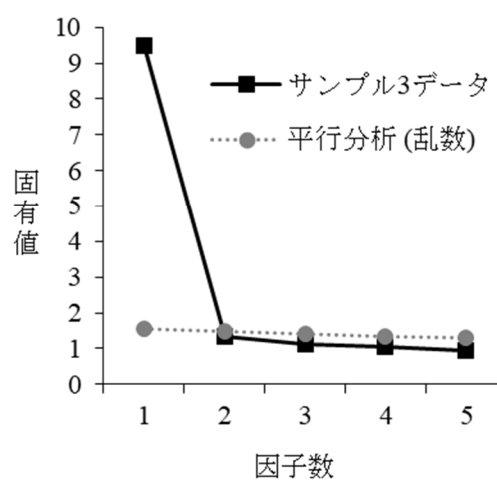

Figure S1. 固有値のスクリープロット, および平行分析の結果

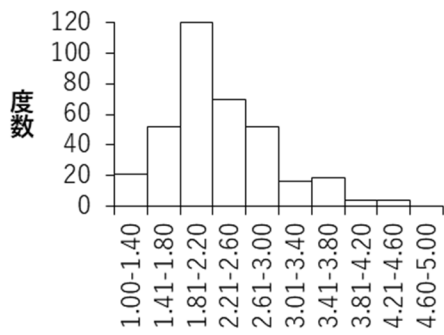

日本語版BPQ-BA超短縮版 (研究1 サンプル1)

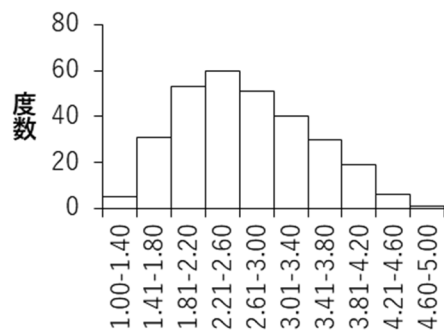

日本語版BPQ-BA超短縮版 (研究1 サンプル2)

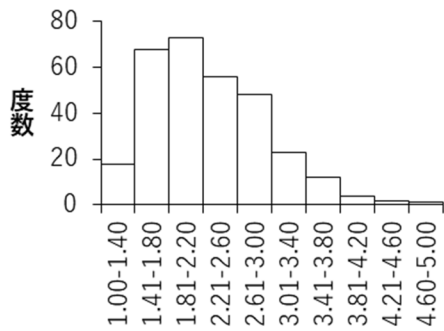

日本語版BPQ-BA超短縮版 (研究2 サンプル3)

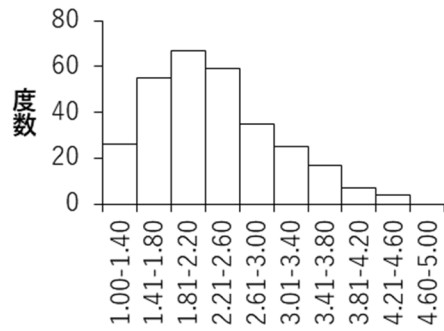

日本語版BPQ-BA超短縮版 (研究2 サンプル4)

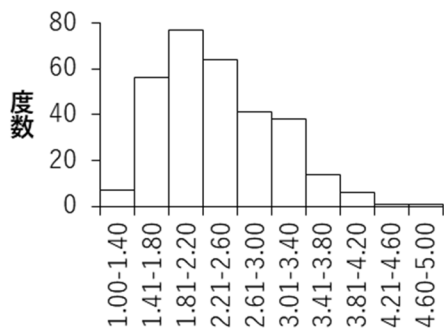

日本語版BPQ-BA短縮版 (研究2 サンプル3)

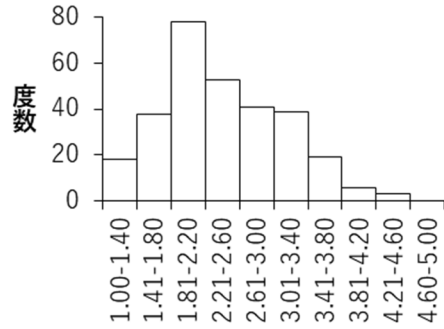

日本語版BPQ-BA短縮版 (研究2 サンプル4)

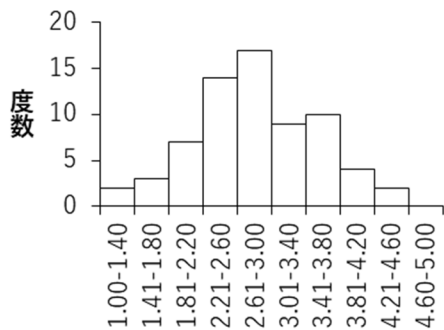

日本語版BPQ-BA超短縮版 (研究3 Time 1)

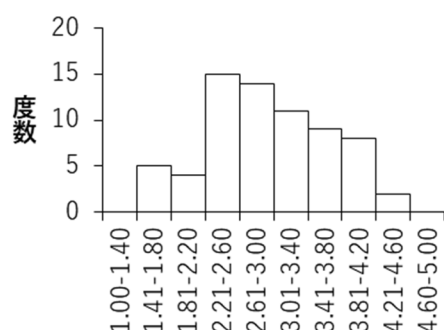

日本語版BPQ-BA超短縮版 (研究3 Time 2)

Figure S2. 各研究における日本語版BPQ-BA超短縮版, および短縮版のヒストグラム

下記のそれぞれの表現のうち、一番あなたの気づきを正確に表わしているものを選んでください。

様々な場面において、私は・・・に気づいています

(“・・・”に以下の1~12を当てはめ、それぞれ回答ください)

|    |                      | 全<br>く<br>な<br>い | た<br>ま<br>に | 時<br>々 | た<br>い<br>て<br>い<br>は | い<br>つ<br>も |
|----|----------------------|------------------|-------------|--------|-----------------------|-------------|
| 1  | 口のなかが乾いているか          | 1                | 2           | 3      | 4                     | 5           |
| 2  | どれだけ早く呼吸をしているか       | 1                | 2           | 3      | 4                     | 5           |
| 3  | 体や身体の一部の腫れ           | 1                | 2           | 3      | 4                     | 5           |
| 4  | 腕や足の筋肉の緊張            | 1                | 2           | 3      | 4                     | 5           |
| 5  | 水の摂取によるむくみ感          | 1                | 2           | 3      | 4                     | 5           |
| 6  | 鳥肌                   | 1                | 2           | 3      | 4                     | 5           |
| 7  | 胃や腸の痛み               | 1                | 2           | 3      | 4                     | 5           |
| 8  | 胃の膨満感や満腹感            | 1                | 2           | 3      | 4                     | 5           |
| 9  | くちびるの震え              | 1                | 2           | 3      | 4                     | 5           |
| 10 | “背筋がぞっとして” 髪の毛が逆立つ感覚 | 1                | 2           | 3      | 4                     | 5           |
| 11 | つばを飲み込む衝動            | 1                | 2           | 3      | 4                     | 5           |
| 12 | どれだけ強く心臓が鼓動しているか     | 1                | 2           | 3      | 4                     | 5           |

Appendix 1. 日本語版 BPQ-BA 超短縮版の全項目

下記のそれぞれの表現のうち、一番あなたの気づきを正確に表わしているものを選んでください。

様々な場面において、私は・・・に気づいています

(“・・・”に以下の1-26を当てはめ、それぞれ回答ください)

|    |                     | 全<br>く<br>な<br>い | た<br>ま<br>に | 時<br>々 | た<br>い<br>て<br>い<br>は | い<br>つ<br>も |
|----|---------------------|------------------|-------------|--------|-----------------------|-------------|
| 1  | よく唾を飲んでしていること       | 1                | 2           | 3      | 4                     | 5           |
| 2  | 咳や咳払いをしようとする衝動      | 1                | 2           | 3      | 4                     | 5           |
| 3  | 口のなかが乾いているか         | 1                | 2           | 3      | 4                     | 5           |
| 4  | どれだけ早く呼吸をしているか      | 1                | 2           | 3      | 4                     | 5           |
| 5  | 目の潤みや涙が出ていること       | 1                | 2           | 3      | 4                     | 5           |
| 6  | 消化に関係する音            | 1                | 2           | 3      | 4                     | 5           |
| 7  | 体や身体の一部の腫れ          | 1                | 2           | 3      | 4                     | 5           |
| 8  | 便意                  | 1                | 2           | 3      | 4                     | 5           |
| 9  | 腕や足の筋肉の緊張           | 1                | 2           | 3      | 4                     | 5           |
| 10 | 水の摂取によるむくみ感         | 1                | 2           | 3      | 4                     | 5           |
| 11 | 顔の筋肉の緊張             | 1                | 2           | 3      | 4                     | 5           |
| 12 | 鳥肌                  | 1                | 2           | 3      | 4                     | 5           |
| 13 | 胃や腸の痛み              | 1                | 2           | 3      | 4                     | 5           |
| 14 | 胃の膨満感や満腹感           | 1                | 2           | 3      | 4                     | 5           |
| 15 | 手のひらに汗をかいていること      | 1                | 2           | 3      | 4                     | 5           |
| 16 | 額に汗をかいていること         | 1                | 2           | 3      | 4                     | 5           |
| 17 | くちびるの震え             | 1                | 2           | 3      | 4                     | 5           |
| 18 | 脇の下に汗をかくこと          | 1                | 2           | 3      | 4                     | 5           |
| 19 | 顔や耳が熱くなっていること       | 1                | 2           | 3      | 4                     | 5           |
| 20 | 歯ざしり                | 1                | 2           | 3      | 4                     | 5           |
| 21 | 全身の震え               | 1                | 2           | 3      | 4                     | 5           |
| 22 | “背筋がぞっとして”髪の毛が逆立つ感覚 | 1                | 2           | 3      | 4                     | 5           |
| 23 | 焦点を合わせるのが難しいこと      | 1                | 2           | 3      | 4                     | 5           |
| 24 | つばを飲み込む衝動           | 1                | 2           | 3      | 4                     | 5           |
| 25 | どれだけ強く心臓が鼓動しているか    | 1                | 2           | 3      | 4                     | 5           |
| 26 | 便秘をしている感覚           | 1                | 2           | 3      | 4                     | 5           |

Appendix 2. 日本語版 BPQ-BA 短縮版の全項目
